# Supplementary material
Source: Springer Nature journal article supplement (https://www.springermedizin.de/resource/supplementary/12882_2009_153_MOESM2_ESM.pdf/9453196)

# eGFR of Patients Pre vs. Post Treatment Adalimumab

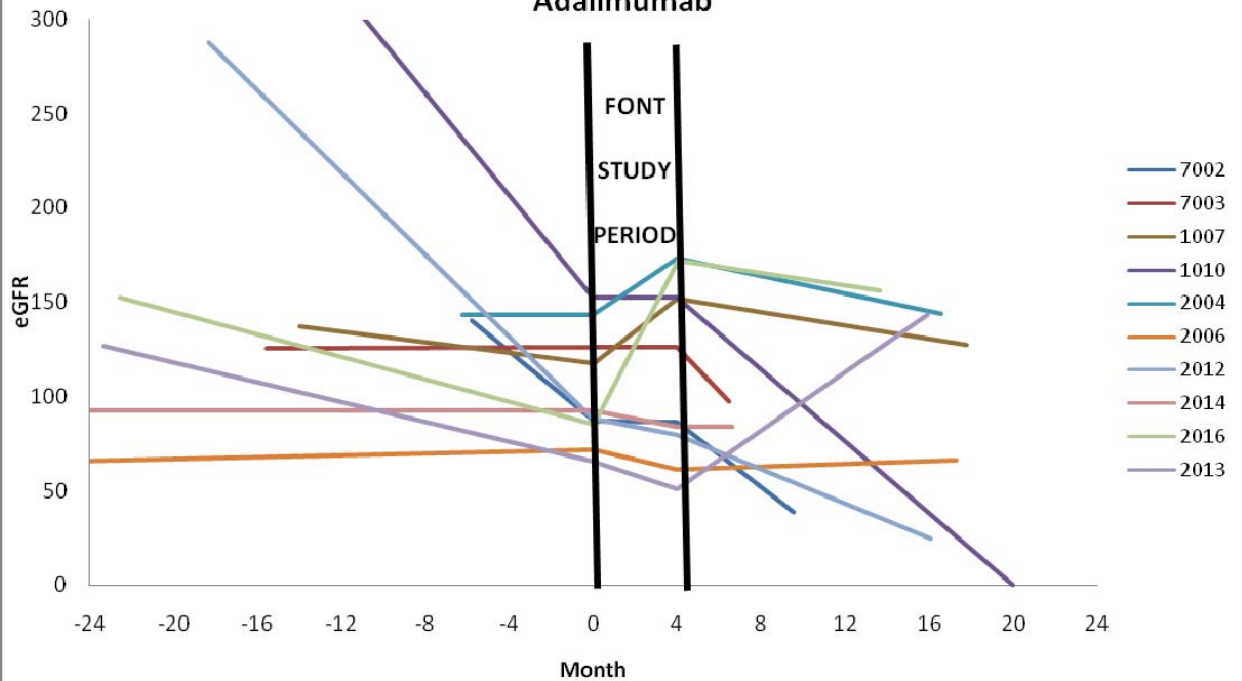

Supplement: MOESM2 [file 9453196]
